# Supplementary material for: Preconcentration of ultra-trace Cu(ii) and Cd(ii) using SPE based on an alizarin complexone modified silica gel with detection using FAAS and determination of ultra-trace Cu(ii) by the naked eye
Source: Royal Society of Chemistry journal article supplement (doi:10.1039/c4ay03114h), 2015-01-01
Supplement: c4ay03114h1.pdf [file c4ay03114h1.pdf]

## Electronic Supplementary Information:

### Figures 1 and 2, FTIR spectra of blank silicone and the AC-SG

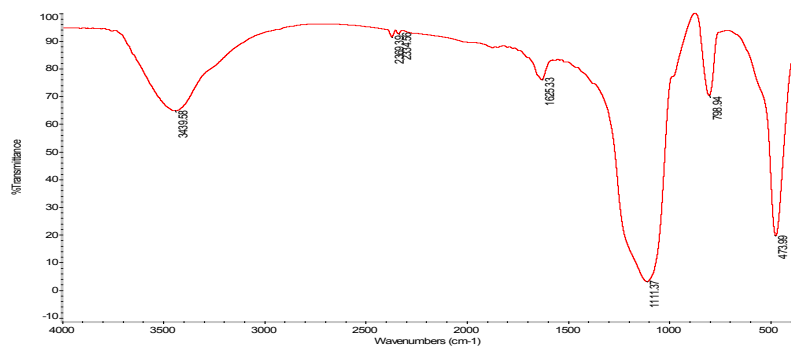

Figure 1.

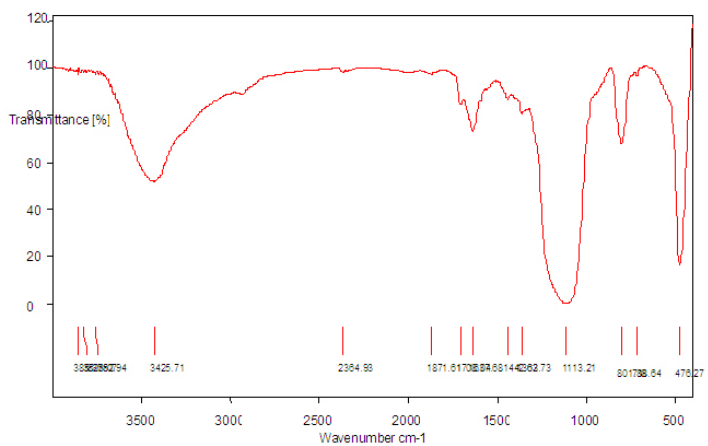

Figure 2

### Figures 3- 5, Thermogravimetric (TG) analysis

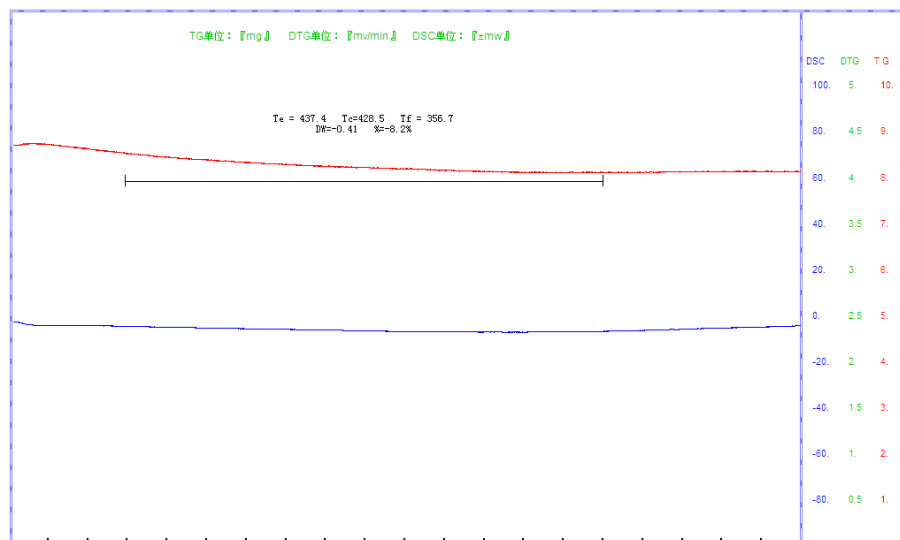

Figure 3. Blank Silica gel

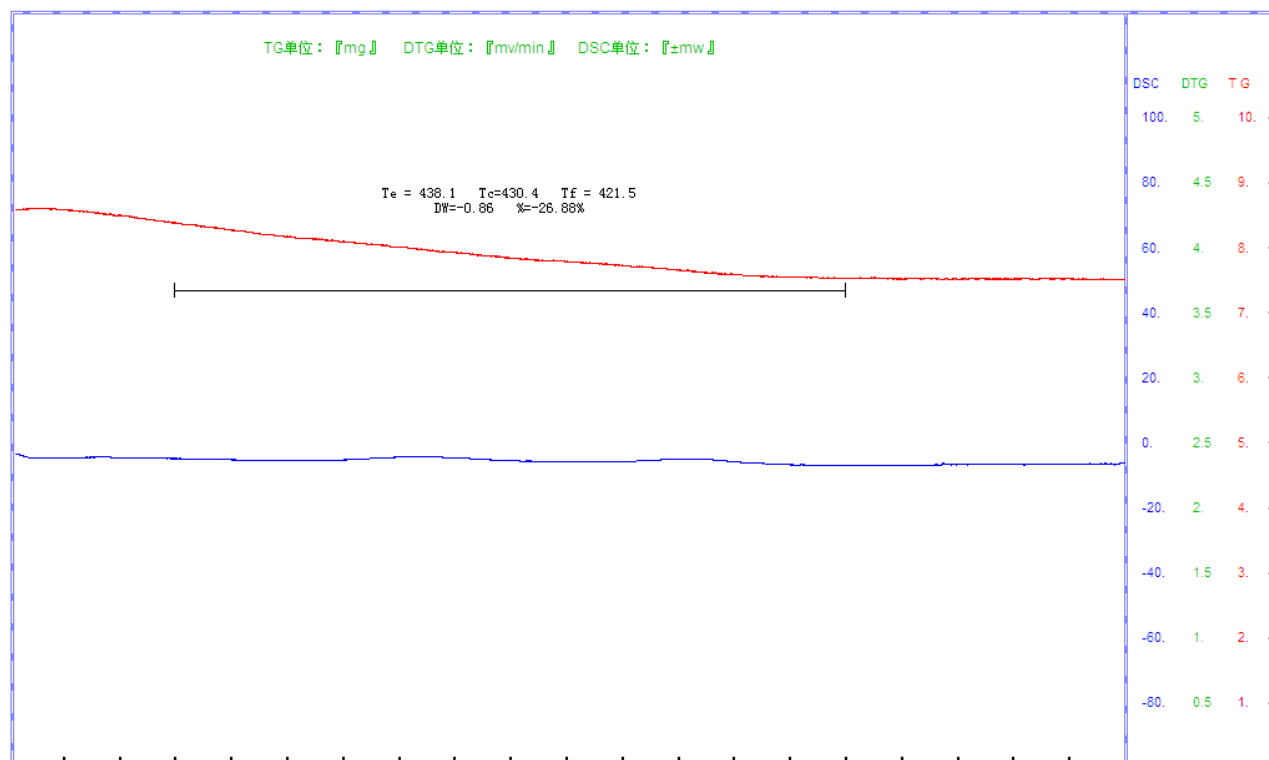

Figure. 4 AC-SG

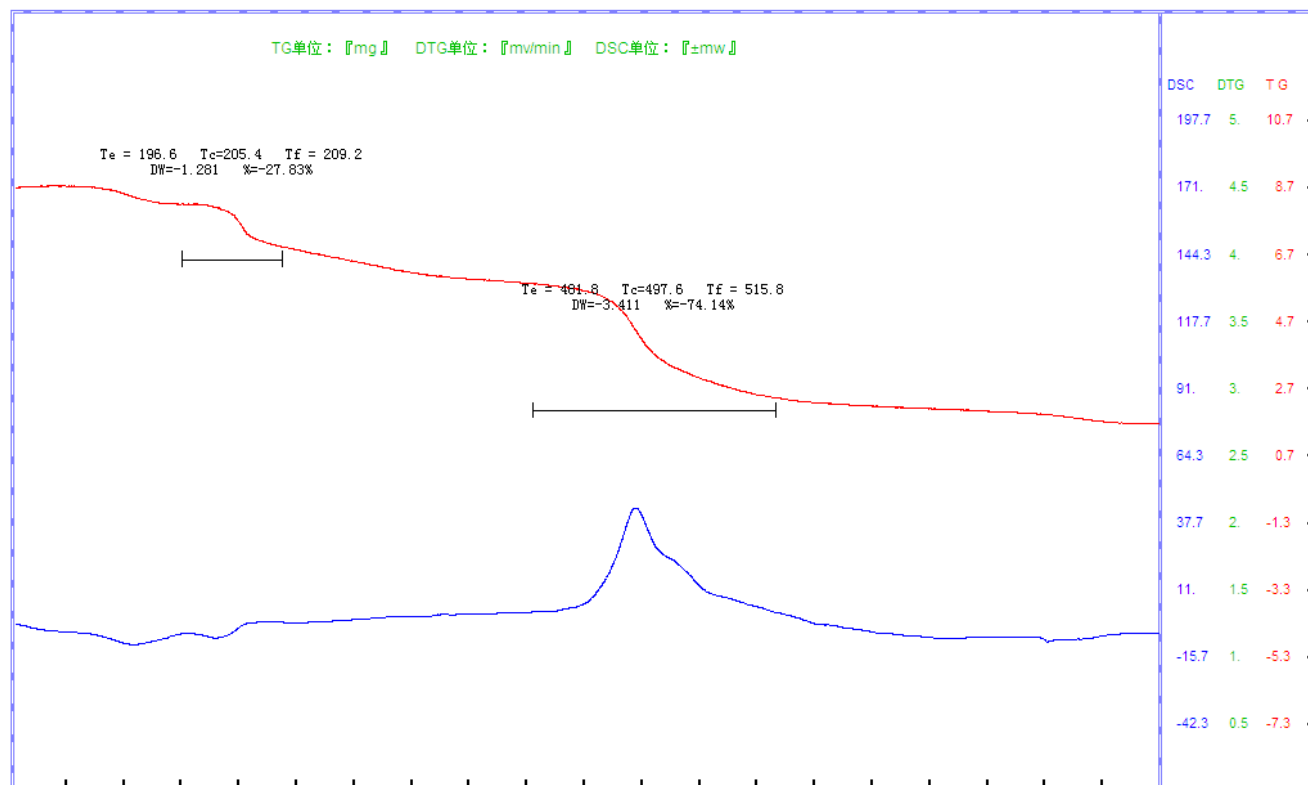

Figure 5. AC
